# Supplementary material for: Mn2@Si15: the smallest triple ring tubular silicon cluster
Source: Royal Society of Chemistry journal article supplement (doi:10.1039/c5cp02257f), 2015-01-01
Supplement: c5cp02257f1.pdf [file c5cp02257f1.pdf]

Supplementary Information:

## **Mn<sub>2</sub>@Si<sub>15</sub>: the smallest triple ring tubular silicon cluster**

**Hung Tan Pham,<sup>&≠</sup> Thuy Thu Thi Phan,<sup>§</sup> Nguyen Minh Tam,<sup>§§</sup> Long Van Duong,<sup>§</sup>**

**My Phuong Pham-Ho<sup>§</sup> and Minh Tho Nguyen<sup>§,\*</sup>**

<sup>&</sup> Computational Chemistry Research Group, Ton Duc Thang University, Ho Chi Minh City, Vietnam

<sup>≠</sup> Faculty of Applied Sciences, Ton Duc Thang University, Ho Chi Minh City, Vietnam

<sup>§</sup> Institute for Computational Science and Technology (ICST), Ho Chi Minh City, Vietnam

<sup>§</sup> Department of Chemistry, KU Leuven, Celestijnenlaan 200F, B-3001 Leuven, Belgium.

\*E-mail: [minh.nguyen@chem.kuleuven.be](mailto:minh.nguyen@chem.kuleuven.be).

This file contains:

- Comparison of the shapes of core s-MOs set of Mn<sub>2</sub>Si<sub>15</sub> produced by DFT calculations with the wavefunctions obtained by the hollow cylinder model.
- Comparison of the shapes of radial r-MOs set of Mn<sub>2</sub>Si<sub>15</sub> produced by DFT calculations with the wavefunctions obtained by the hollow cylinder model.
- Comparison of the shapes of tangential t-MOs set of Mn<sub>2</sub>Si<sub>15</sub> produced by DFT calculations with the wavefunctions obtained by the hollow cylinder model.

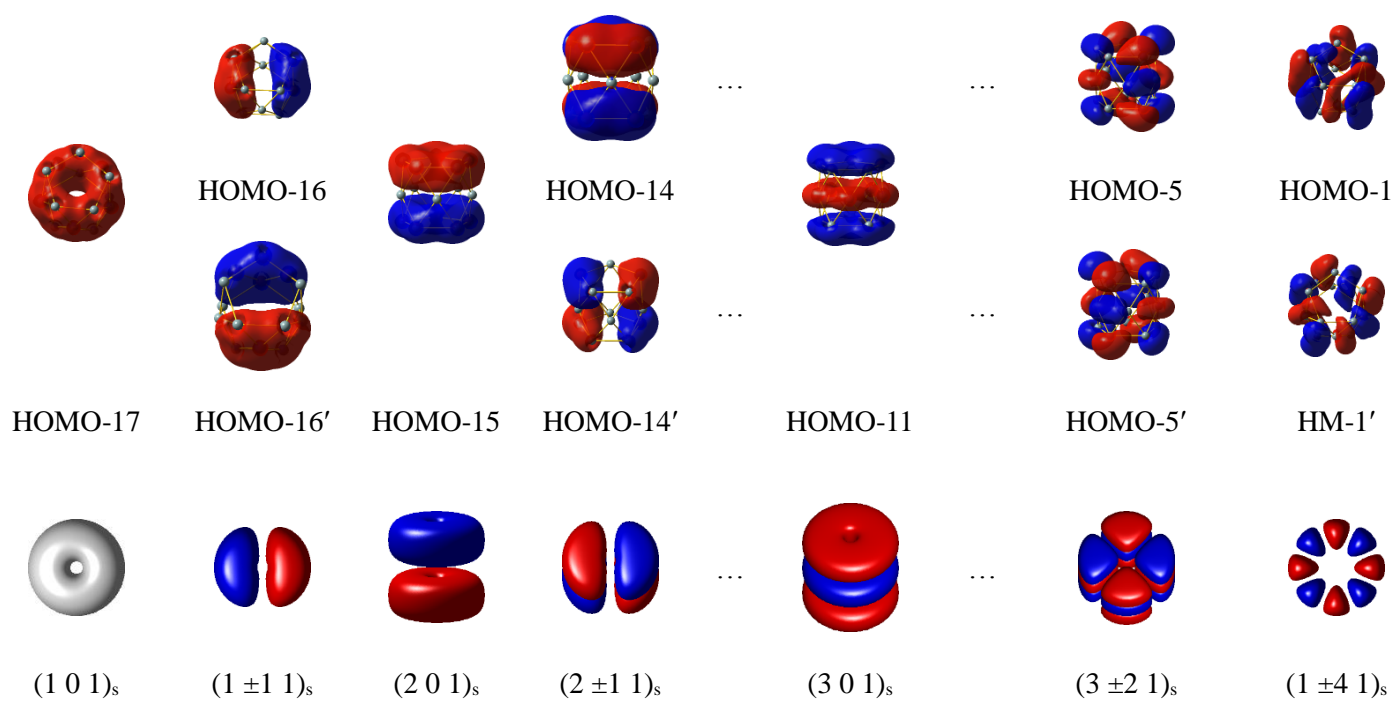

**Figure S2.** Some shapes of s-MOs of Si<sub>15</sub> triple ring computed using DFT/BP86/6-311+G(d) and the corresponding wave function obtained by solving the Schrödinger equation for a particle in a hollow cylinder model.

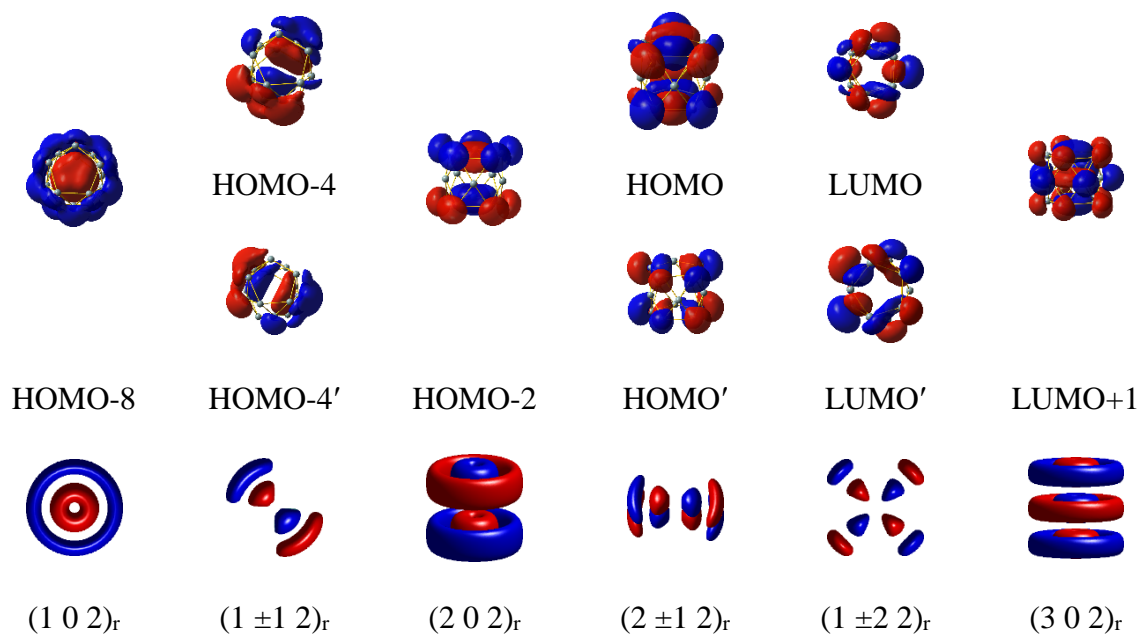

**Figure S3.** Shapes of r-MOs of Si<sub>15</sub> triple ring computed using bp86/6-311+G(d) and the corresponding wave function obtained by solving the Schrödinger equation for the particle in a hollow cylinder model.

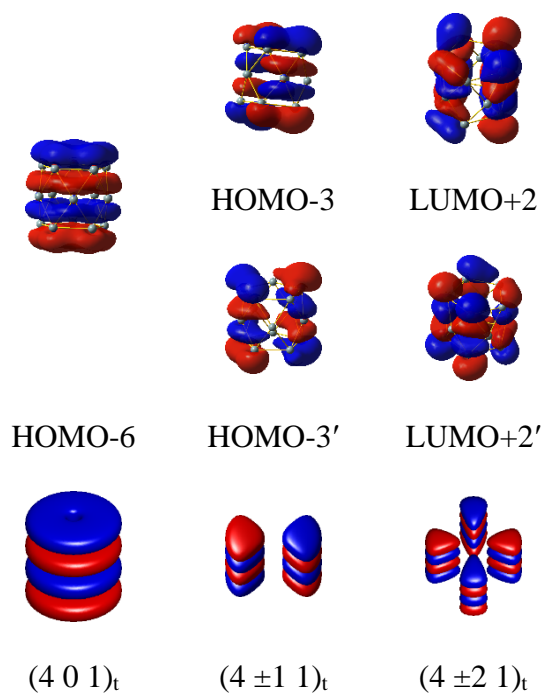

**Figure S4.** Shapes of t-MOs of Si<sub>15</sub> triple ring computed using DFT/BP86/6-311+G(d) and the corresponding wave function obtained by solving the Schrödinger equation for the particle in a hollow cylinder model.
